# Supplementary material for: Stable structures and superconductivity of an At–H system at high pressure
Source: Royal Society of Chemistry journal article supplement (doi:10.1039/c8cp04317e), 2018-01-01
Supplement: c8cp04317e1.pdf [file c8cp04317e1.pdf]

**Supplementary information**

**Stable structures and superconductivity of At-H  
system at high pressure**

Ziji Shao, Yanping Huang, Defang Duan\*, Yanbin Ma, Hongyu Yu, Hui Xie, Da Li,

Fubo Tian, Bingbing Liu, Tian Cui\*

State Key Laboratory of Superhard Materials, College of Physics, Jilin University,

Changchun, 130012, P. R. China

**Table S1** Structure parameters of the stable phases for AtH<sub>2</sub> and AtH<sub>4</sub>.

| Structure<br>Space<br>Pressure                 | Parameters<br>(Å, deg)                           | Atom            | x                             | y                             | z                             |
|------------------------------------------------|--------------------------------------------------|-----------------|-------------------------------|-------------------------------|-------------------------------|
| AtH <sub>2</sub><br><i>Cmcm</i><br>(50 GPa)    | a=3.6443<br>b=9.4561<br>c=3.3341                 | H1<br>At1       | 0.00000<br>0.00000            | -0.06722<br>-0.64446          | -0.36522<br>-0.75000          |
| AtH <sub>2</sub><br><i>Pnma</i><br>(200 GPa)   | a=5.8264<br>b=2.9241<br>c=4.5377                 | H1<br>H5<br>At1 | 0.44361<br>0.49799<br>0.17820 | 0.25000<br>0.75000<br>0.75000 | 0.67874<br>0.47529<br>0.64043 |
| AtH <sub>4</sub><br><i>P6/mmm</i><br>(100 GPa) | a=3.2725<br>b=3.2725<br>c=3.0160<br>$\gamma=120$ | H1<br>At1       | 0.66667<br>0.00000            | 0.33333<br>0.00000            | 0.62953<br>0.00000            |
| AtH <sub>4</sub><br><i>Cmmm</i><br>(250 GPa)   | a= 4.9931<br>b= 2.7459<br>c= 3.0599              | H1<br>At1       | -0.70156<br>-0.50000          | 0.00846<br>-0.50000           | 1.00000<br>0.50000            |

**Table S2** The H-H distances of the H<sub>2</sub>-units and the charge transferred from At to H in AtH<sub>2</sub> and AtH<sub>4</sub> which is represented by  $\sigma$  ( $e$ ) based on the Bader charge analysis

|                                                | Atom | $\sigma$ ( $e$ ) | H-H distances ( $\text{\AA}$ ) |
|------------------------------------------------|------|------------------|--------------------------------|
| AtH <sub>2</sub><br><i>Cmcm</i><br>(50 GPa)    | At   | -0.16            | 0.77                           |
| AtH <sub>2</sub><br><i>Pnma</i><br>(200 GPa)   | At   | -0.25            | 0.78                           |
| AtH <sub>4</sub><br><i>P6/mmm</i><br>(100 GPa) | At   | -0.35            | 0.78                           |
| AtH <sub>4</sub><br><i>Cmmm</i><br>(250 GPa)   | At   | -0.48            | 0.80                           |

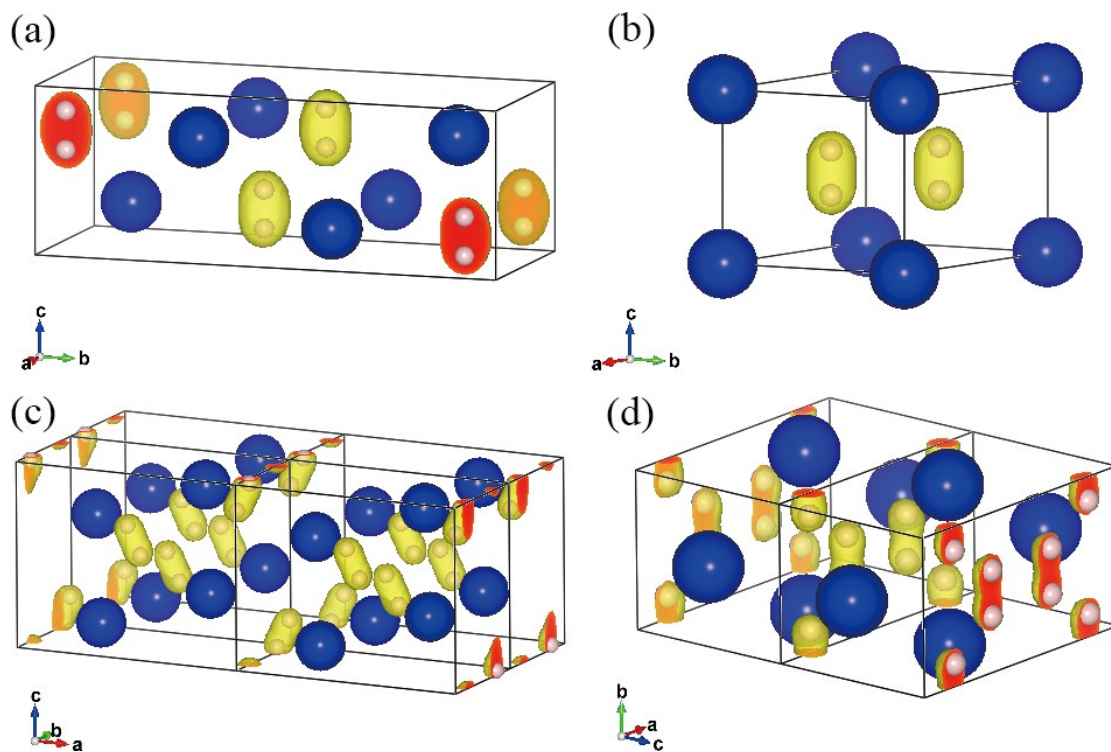

**Fig. S1** The calculated electron localization function (ELF) for (a)  $Cmc$ -AtH<sub>2</sub>, (b)  $Pnma$ -AtH<sub>2</sub>, (c)  $P6/mmm$ -AtH<sub>4</sub>, (d)  $Cmmm$ -AtH<sub>4</sub>. The isosurfaces are 0.9.

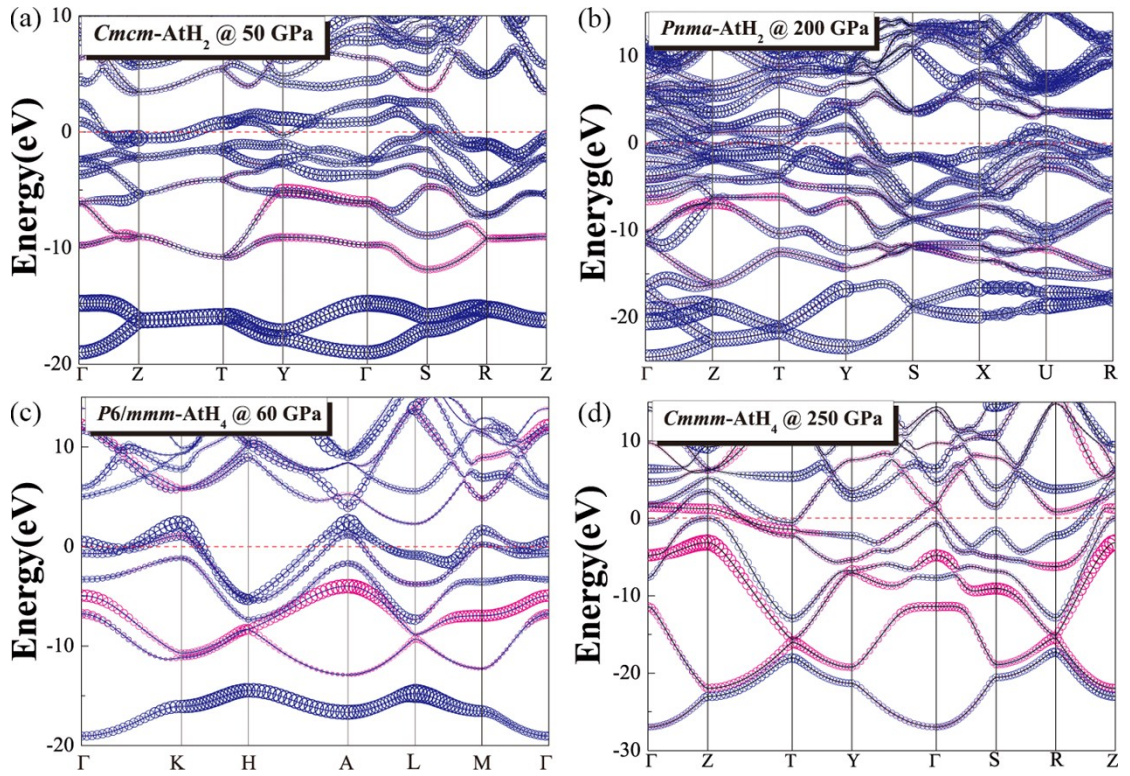

**Fig.S2** Electronic band structure with the projection onto H atoms (magenta circles) and At atoms (blue circles) for (a) *Cmc*-AtH<sub>2</sub> at 50 GPa. (b) *Pnma*-AtH<sub>2</sub> at 200 GPa, (c) *P6/mmm*-AtH<sub>4</sub> at 60 GPa, (d) *Cmmm*-AtH<sub>4</sub> at 250 GPa.

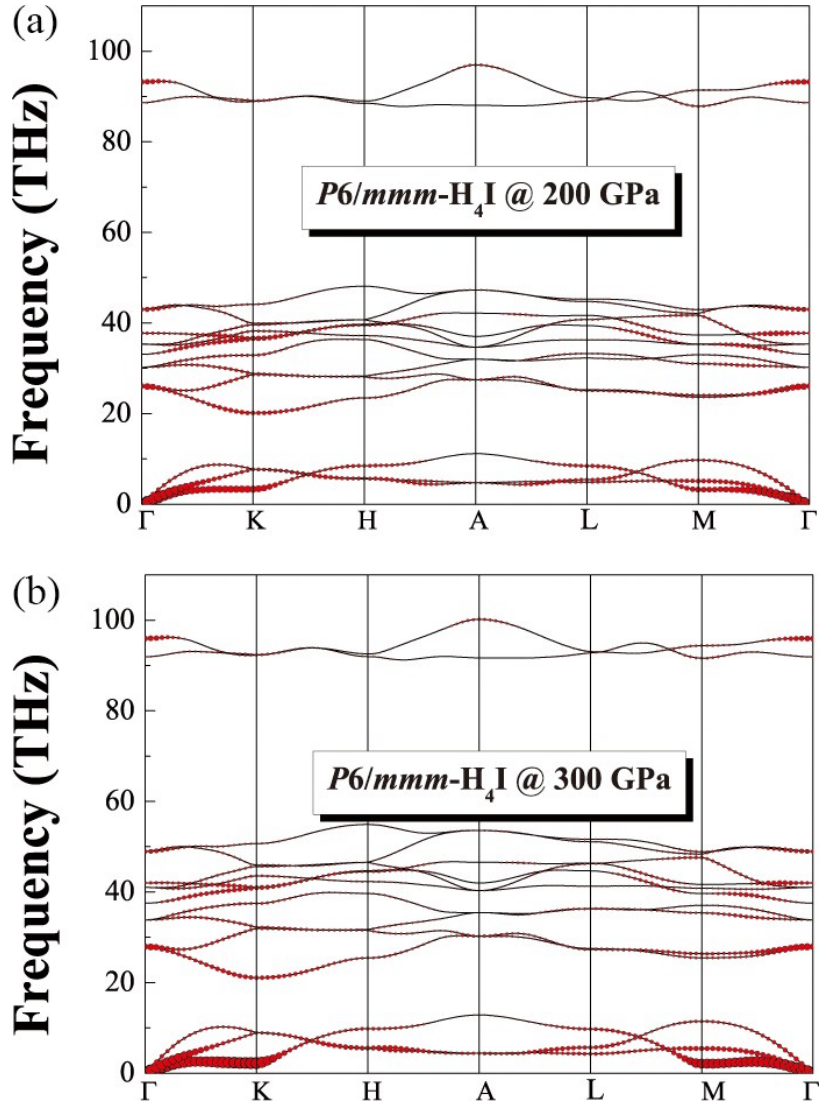

**Fig.S3** (Color online) Phonon dispersion curves for  $P6/mmm-IH_4$  at 200 GPa and 300 GPa with electron-phonon parameter  $\lambda_{q,j}(\omega)$  of each mode  $(q, j)$ . The red solid circles shown in the band structures indicate EPC with a radius proportional to their respective strength. A larger radius represents greater  $\lambda_{q,j}(\omega)$ .

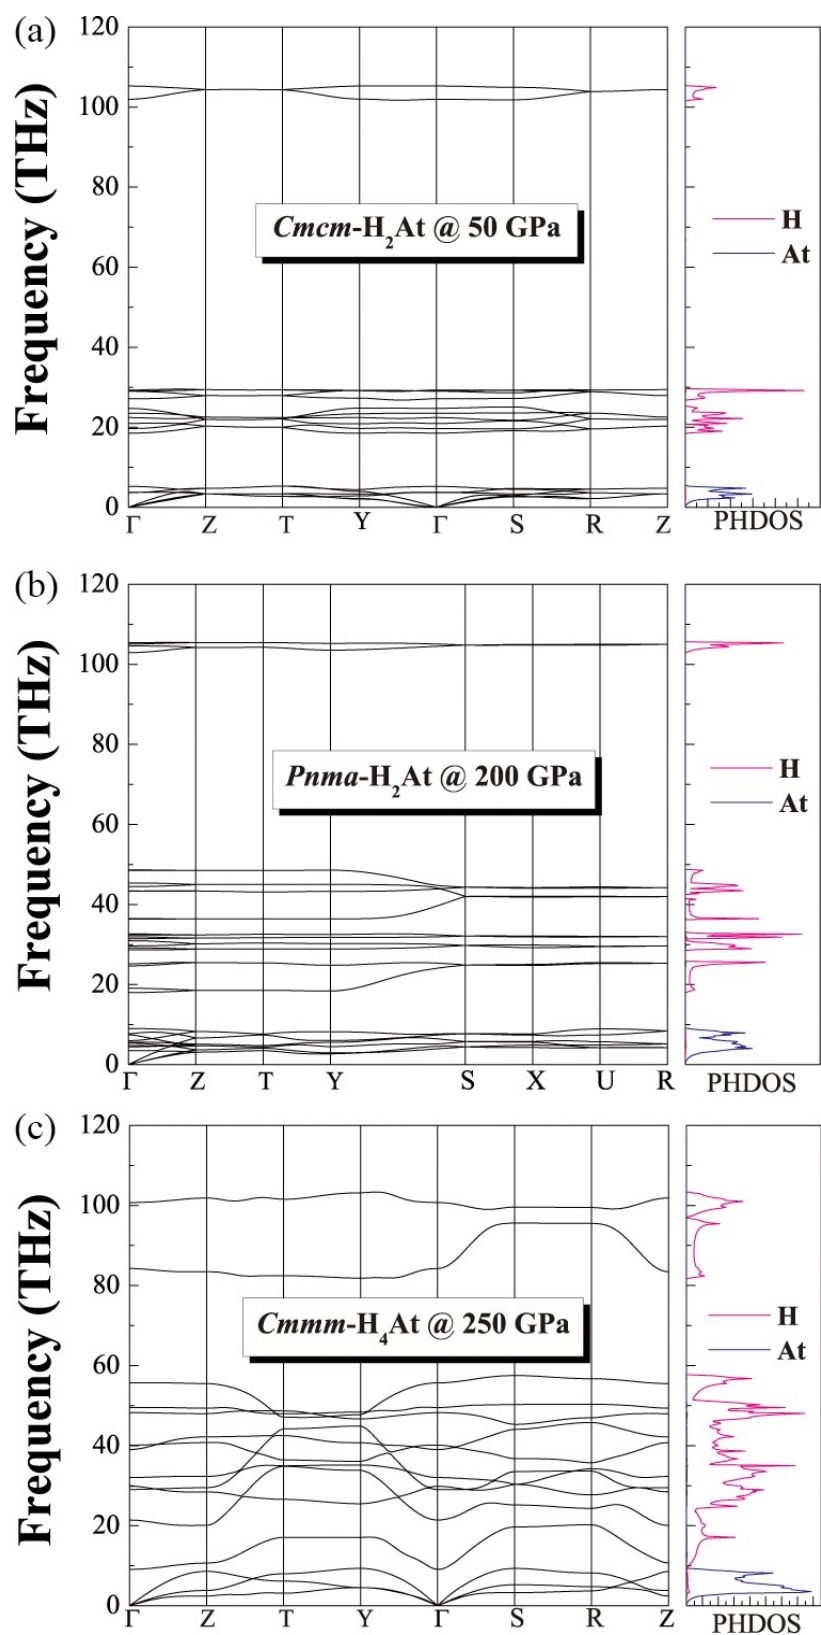

**Fig. S4** Phonon dispersion curves, phonon density of states (PHDOS) projected on At and H atoms for (a)  $Cmc-AtH_2$  at 50 GPa. (b)  $Pnma-AtH_2$  at 200 GPa, (c)  $Cmmm-AtH_4$  at 250 GPa.
